# Supplementary material for: Biomarker Discovery for the Carcinogenic Heterogeneity Between Colon and Rectal Cancers Based on lncRNA-Associated ceRNA Network Analysis
Source: Front Oncol. 2020 Oct 30;10:535985. doi: 10.3389/fonc.2020.535985 (PMC7662689; doi:10.3389/fonc.2020.535985)
Supplement: Supplementary file 5 [file Table_4.xlsx]

## Sheet: Sheet1
Supplementary Table 4. lncRNAs with hub node properties in the LceNET of colon M0/N, colon M1/N, rectal M0/N and rectal M1/N groups, respectively.
Colon M0/N		Colon M1/N		Rectal M0/N		Rectal M1/N
lncRNA	Degree	lncRNA	Degree	lncRNA	Degree	lncRNA	Degree
MALAT1	191	MALAT1	186	SNHG1	81	KCNQ1OT1	100
KCNQ1OT1	118	KCNQ1OT1	117	KCNQ1OT1	81	CTD-2228K2.7	99
SNHG1	62	SNHG1	93	CTD-2228K2.7	47	SNHG1	87
SNHG16	52	ZFAS1	56	LINC00641	45	ZFAS1	47
LINC00894	40	SNHG17	39	MAGI2-AS3	40	LINC00641	39
RP11-159D12.2	36	RP1-309I22.2	38			LINC00894	34
		SNHG3	35			SVIL-AS1	29
		SNHG15	34			SNHG17	29
		LINC00894	33			SNHG15	27
		GABPB1-AS1	29
